# Supplementary material for: Dose-Dependent Beneficial Effects of Tryptophan and Its Derived Metabolites on Akkermansia In Vitro: A Preliminary Prospective Study
Source: MDPI journal article supplement (doi:10.3390/microorganisms9071511), 2021-07-14
Supplement: s1 [file s1]

# Supplementary materials

## Dose-Dependent Beneficial Effects of Tryptophan and Its Derived Metabolites on *Akkermansia* in vitro: A Preliminary Prospective Study

Jia Yin, Yujie Song, Yaozhong Hu, Yuanyifei Wang, Bowei Zhang, Jin Wang, Xuemeng Ji, and Shuo Wang\*

Tianjin Key Laboratory of Food Science and Health, School of Medicine, Nankai University, Tianjin 300071, China; spyinjia@163.com (J.Y.); yjsongqcyy@163.com (Y.S.); yzhu@nankai.edu.cn (Y.H.); wangyyf163@163.com (Y.W.); bwzhang@nankai.edu.cn (B.Z.); wangjin@nankai.edu.cn (J.W.); jixuemeng@nankai.edu.cn (X.J.)  
\* Correspondence: wangshuo@nankai.edu.cn; Tel.: +86-22-85358445

**Table S1.** Operating parameters in MRM-mode.

| Compound                      | Molecular<br>formula                                          | M<br>(g/mol) | M+X+<br>(m/z)      | Fragments<br>(m/z)    | DP<br>(V) | EP<br>(V) | CE<br>(V) |
|-------------------------------|---------------------------------------------------------------|--------------|--------------------|-----------------------|-----------|-----------|-----------|
| 5-hydroxytryptamine<br>(5-HT) | C <sub>10</sub> H <sub>12</sub> N <sub>2</sub> O              | 176.21       | M + H <sup>+</sup> | Q1 177.20 →<br>160.20 | 16        | 6         | 20        |
|                               |                                                               |              |                    | Q2 177.20 →<br>132.00 | 16        | 8         | 30        |
|                               |                                                               |              |                    | Q1 209.00 →<br>192.00 | 11        | 11        | 11        |
| Kynurenine (Kyn)              | C <sub>10</sub> H <sub>12</sub> N <sub>2</sub> O <sub>3</sub> | 208.21       | M + H <sup>+</sup> | Q2 209.00 →<br>146.00 | 29        | 29        | 29        |
|                               |                                                               |              |                    | Q3 209.00 →<br>94.00  | 25        | 25        | 25        |
|                               |                                                               |              |                    | Q1 188.20 →           | 35        | 12        | 21        |

|                      |                                                  |        |                    |             |    |    |    |
|----------------------|--------------------------------------------------|--------|--------------------|-------------|----|----|----|
|                      |                                                  |        |                    | 146.10      |    |    |    |
| 3-Indoleacrylic acid | C <sub>11</sub> H <sub>9</sub> NO <sub>2</sub>   | 187.19 | M + H <sup>+</sup> | Q2 188.20 → | 36 | 6  | 18 |
| (IA)                 |                                                  |        |                    | 160.10      |    |    |    |
|                      |                                                  |        |                    | Q3 188.20 → | 16 | 9  | 18 |
|                      |                                                  |        |                    | 170.20      |    |    |    |
|                      |                                                  |        |                    | Q1 176.10 → | 30 | 10 | 35 |
|                      |                                                  |        |                    | 130.00      |    |    |    |
| Indole acetate (IAA) | C <sub>10</sub> H <sub>9</sub> NO <sub>2</sub>   | 175.18 | M + H <sup>+</sup> | Q2 176.10 → | 30 | 10 | 35 |
|                      |                                                  |        |                    | 103.10      |    |    |    |
|                      |                                                  |        |                    | Q3 176.10 → | 30 | 10 | 35 |
|                      |                                                  |        |                    | 77.10       |    |    |    |
|                      |                                                  |        |                    | Q1 175.20 → | 29 | 29 | 29 |
| Indole-3-Acetamide   | C <sub>10</sub> H <sub>10</sub> N <sub>2</sub> O | 174.20 | M + H <sup>+</sup> | 130.20      |    |    |    |
| (IAM)                |                                                  |        |                    | Q2 175.20 → | 30 | 30 | 30 |
|                      |                                                  |        |                    | 105.00      |    |    |    |
|                      |                                                  |        |                    | Q1 146.10 → | 24 | 24 | 24 |
| Indole-3-            | C <sub>9</sub> H <sub>7</sub> NO                 | 145.16 | M + H <sup>+</sup> | 118.00      |    |    |    |
| carboxaldehyde       |                                                  |        |                    | Q2 146.10 → | 35 | 35 | 35 |
| (Icld)               |                                                  |        |                    | 118.00      |    |    |    |
|                      |                                                  |        |                    | Q1 206.20 → | 33 | 33 | 33 |
| Indole lactate (ILA) | C <sub>11</sub> H <sub>11</sub> NO <sub>3</sub>  | 205.21 | M + H <sup>+</sup> | 170.10      |    |    |    |
|                      |                                                  |        |                    | Q2 206.20 → | 33 | 33 | 33 |

|                              |                                                 |        |                    |             |    |    |    |
|------------------------------|-------------------------------------------------|--------|--------------------|-------------|----|----|----|
| Indole                       | C <sub>8</sub> H <sub>7</sub> N                 | 117.15 | M + H <sup>+</sup> | 118.30      |    |    |    |
|                              |                                                 |        |                    | Q1 118.00 → | 9  | 10 | 30 |
|                              |                                                 |        |                    | 91.00       |    |    |    |
|                              |                                                 |        |                    | Q2 118.00 → | 9  | 10 | 24 |
| 3-Indolepropionic acid (IPA) | C <sub>11</sub> H <sub>11</sub> NO <sub>2</sub> | 189.21 | M + H <sup>+</sup> | 63.00       |    |    |    |
|                              |                                                 |        |                    | Q1 190.20 → | 29 | 12 | 26 |
|                              |                                                 |        |                    | 130.30      |    |    |    |
|                              |                                                 |        |                    | Q2 190.20 → | 25 | 8  | 21 |
|                              |                                                 |        |                    | 172.30      |    |    |    |

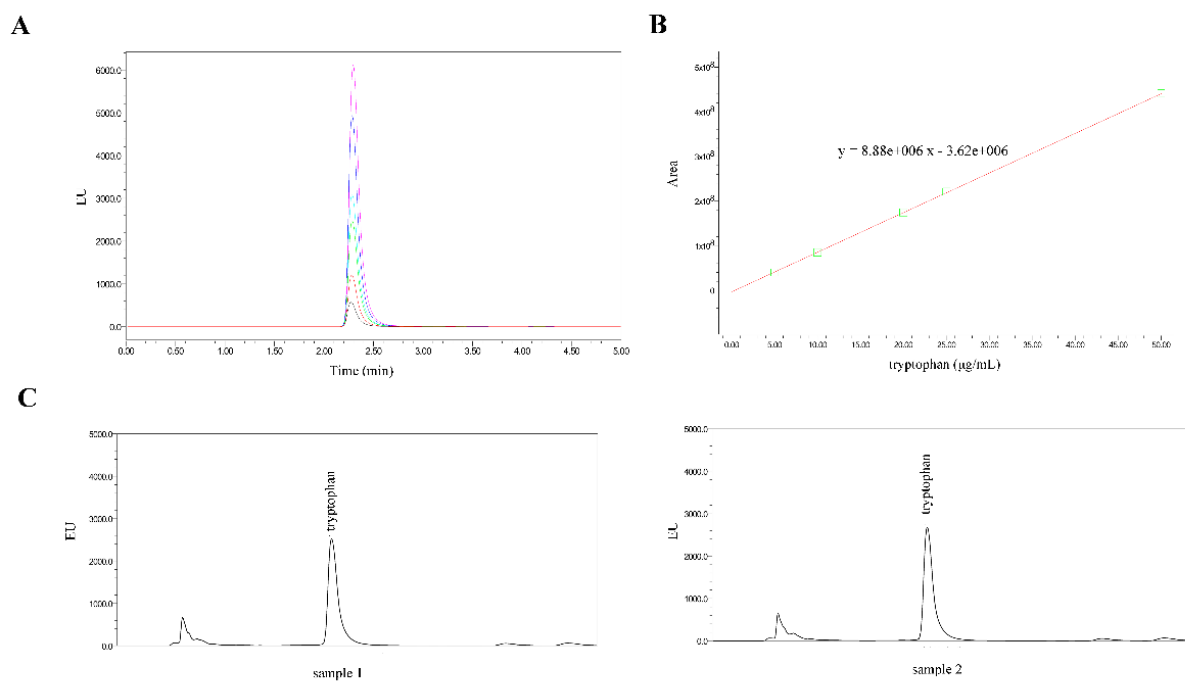

**Figure S1.** The analysis of the level of tryptophan in BHI medium. (A) Standards overlapping chromatogram; (B) Standard curve; (C) Analysis of tryptophan contents of BHI medium.

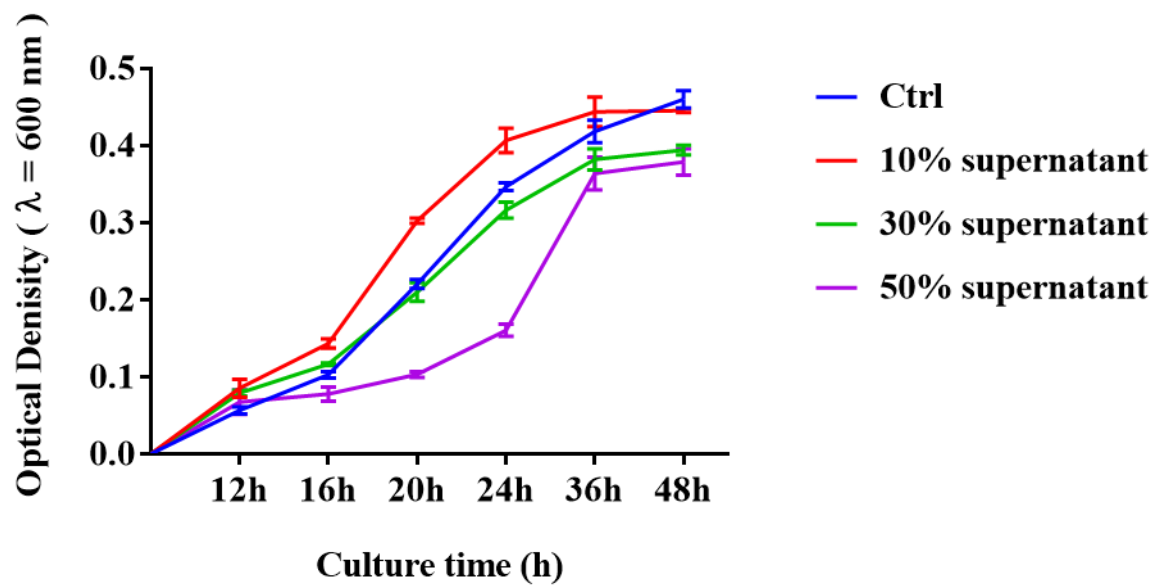

**Figure S2.** The OD<sub>600</sub> of *A. muciniphila* BAA-835<sup>T</sup> cultured with supernatant of *A. muciniphila* BAA-835<sup>T</sup>.
